# Supplementary material
Source: ML conference proceedings conference paper supplement (https://openreview.net/forum?id=0Sex2H5Jnn)
Supplement: supplementary_material [file attachment]

## Supplementary Material

# CogniLoad: A Synthetic Natural Language Reasoning Benchmark With Tunable Length, Intrinsic Difficulty, and Distractor Density

The supplementary material is organized as follows:

- Appendix A investigates  $\rho$  relative to  $N$  and  $d$ .
- Appendix B analyses and discusses interaction effects among  $d$ ,  $N$ , and  $\rho$
- Appendix C charts model performance reported with error-bars.
- Appendix D discusses the evaluation, scoring pipeline, and error taxonomy.
- Appendix E reports the distribution of error types across models and different levels of  $d$  and  $N$ .
- Appendix F compares the AIC values of linear vs quadratic  $\rho$  in the GLM regression.
- Appendix G details the complete attribute ontology.
- Appendix H lists the token-length distribution of prompts and output models per model by  $d$  and  $N$ .

## A Investigating $\rho$ relative to $N$ and $d$

In Figure 1 of the paper we discover a characteristic U-shape of the performance of LLMs on CogniLoad relative to  $\rho$  (i.e., the ratio of distractors to essential elements). The following figures investigate this U-shape at different levels of difficulty (Figure 1) and statement length (Figure 2).

Figure 1 plots mean accuracy as a function of the needle-to-hay ratio  $\rho$  (higher  $\rho$  means more signal per distractor) under three difficulty settings  $d = 1, 5, 10$ . For the easiest tasks ( $d = 1$ , left) accuracies are high and largely flat; most models show at most a shallow U-shape, with a mild dip around  $\rho = 25\%–50\%$  and a small recovery by  $\rho \geq 75\%$ . At intermediate difficulty ( $d = 5$ , centre) the trough widens: many curves drop sharply from  $\rho = 10\%$  to  $25\%$  and bottom out across  $\rho \approx 25\%–50\%$  before rebounding at high  $\rho$ . A notable exception is EXAONE-Deep-32B, which trends downward as  $\rho$  increases for  $d \geq 5$ . Under the hardest condition ( $d = 10$ , right) capability tiers separate. Frontier models remain robust and still recover at high  $\rho$ —averaged over  $\rho$ , GPT-5 0,821, O3 0,804, GPT-5-mini 0,675, O4-mini 0,646, and Gemini-2.5-Pro 0,654—whereas mid-size and small models stay low despite a late uptick (e.g., DeepSeek-R1-0528 0,475; DeepSeek-R1-Distill-Llama-70B 0,361; QwQ-32B 0,300; Qwen3-32B 0,280; Phi-4-reasoning 0,256; Qwen3-1,7B 0,110). Overall, the panels show that (i) accuracy shifts downward and the U-shape becomes more pronounced as  $d$  increases; (ii) recovery at high  $\rho$  is strongly model-dependent and favours larger, reasoning-tuned systems; and (iii) the moderate- $\rho$  regime ( $\rho \approx 25\%–50\%$ ) remains the most adversarial, where balancing signal and noise is hardest.

Figure 2 shows mean accuracy as a function of the needle-to-hay ratio  $\rho$  for  $N = 20$  (left),  $N = 100$  (centre), and  $N = 250$  (right). At  $N = 20$  many systems still display a clear U-shape: accuracy begins near 1,0, dips at medium clutter around  $\rho \approx 25\%–50\%$ , and then rebounds as needles dominate. As the context grows, this dependency compresses and then largely disappears. At  $N = 100$  the strongest models are nearly  $\rho$ -invariant (e.g., curves remain between about 0,93 and 0,97), while mid-tier models retain only a shallow trough. By  $N = 250$  most curves are flat or gently increasing with  $\rho$  at much lower levels; only the frontier models exhibit a modest late uptick.

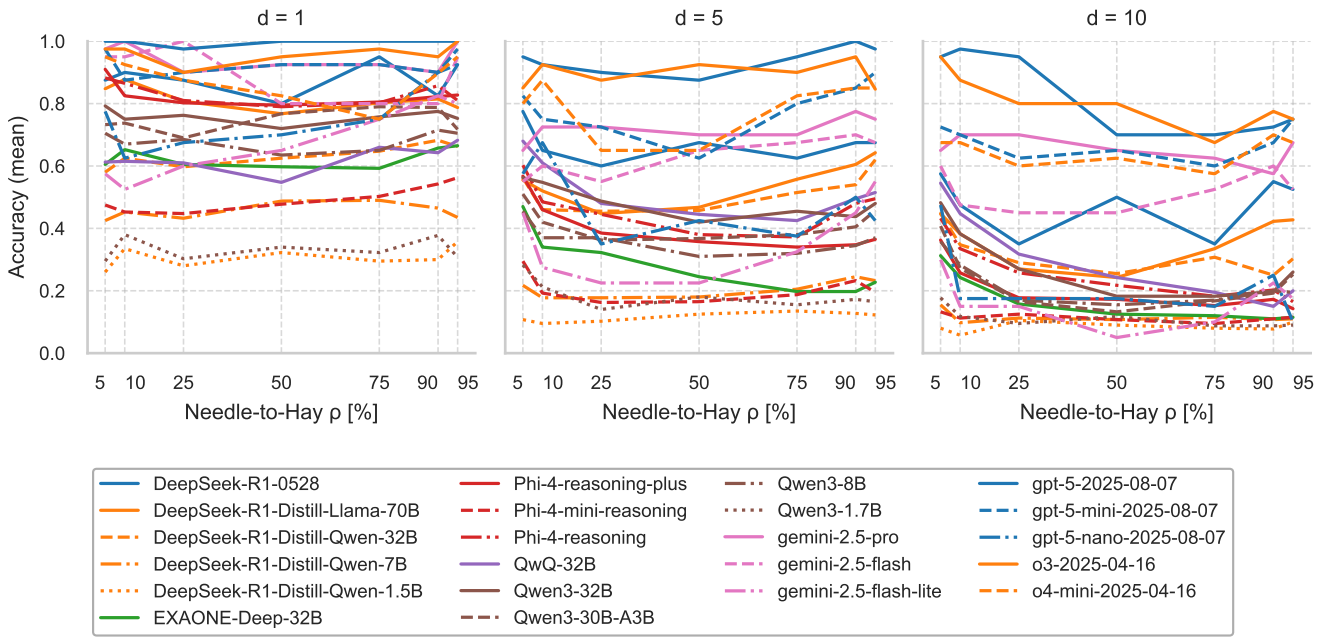

Figure 1: Distractor ratio  $\rho$  relative to  $d$  for  $d \in \{1, 5, 10\}$

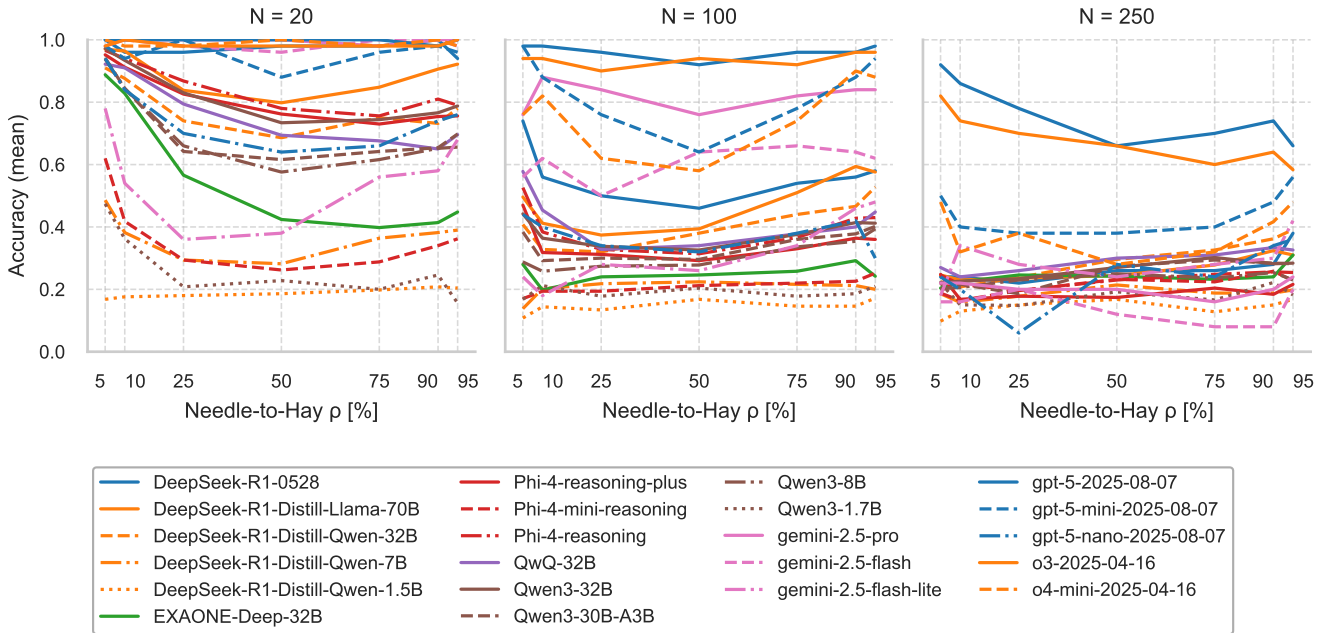

Figure 2: Distractor ratio  $\rho$  relative to  $N$  for  $N \in \{20, 100, 250\}$

Taken together, the two figures show that difficulty  $d$  and length  $N$  both depress accuracy but modulate its dependence on  $\rho$  in different ways. Increasing  $d$  accentuates the classic U-shape (i.e., many models drop from

$\rho = 10\%$  into the mid-range  $\rho \approx 25\%–50\%$  and then recover as needles dominate) whereas increasing  $N$  shifts the whole curve downward and progressively flattens it. These stresses reveal a clear stratification: frontier models remain comparatively robust (retaining some high- $\rho$  gains and partial  $\rho$ -invariance), a mid-tier exhibits a pronounced but narrowing mid- $\rho$  trough as  $N$  grows, and small models settle at low, nearly  $\rho$ -insensitive performance. In short, the mid- $\rho$  band 25–50% is the most adversarial at fixed  $N$  and  $d$ , but at long contexts the primary failure mode becomes  $N$  itself rather than  $\rho$ .

## B Interaction effects among $d$ , $N$ , and $\rho$

To probe whether load dimensions compound each other in predictable ways, we fit, for each model, a logistic GLM that augments the main-effects specification with all pairwise and three-way interactions among intrinsic difficulty  $d$ , effective length  $\log_{10} N$ , and the needle ratio  $\rho$ , while retaining a quadratic main effect for  $\rho$  to capture the observed U-shape:

$$\text{logit } P(\text{correct}) = \beta_0 + [d, \log_{10} N, \rho] + [d:\log_{10} N, d:\rho, \log_{10} N:\rho] + [d:\log_{10} N:\rho] + \rho^2.$$

In Table 1 we report for each interaction the coefficient  $\beta$  and an ANOVA-style likelihood-ratio  $p$ -value ( $p_{\text{LR}}$ ) obtained by dropping that interaction from the full model (see Table).

### B.1 Global patterns

Three robust patterns emerge across models:

- A strong  $d \times N$  interaction is widespread and negative: 17/22 models show  $p_{\text{LR}} < 0.01$  with  $\beta_{d \times N} < 0$  (e.g., QwQ-32B:  $-0.39$ ,  $p_{\text{LR}} = 1.25\text{e-}33$ ; Phi-4-reasoning:  $-0.45$ ,  $p_{\text{LR}} = 1.94\text{e-}30$ ). This indicates that increases in intrinsic difficulty and sequence length compound to reduce accuracy additively. Frontier systems (gpt-5, o3) show no detectable  $d \times N$  interaction (all  $p_{\text{LR}} > 0.3$ ), consistent with their near-separable responses to  $d$  and  $N$  at current loads.
- A clear  $d \times \rho$  interaction is present in 13/22 models (all  $\beta_{d \times \rho} < 0$ ,  $p_{\text{LR}} \leq 0.01$  in those cases; e.g., QwQ-32B:  $-0.96$ , EXAONE-Deep-32B:  $-0.89$ ). This confirms that higher intrinsic difficulty exacerbates the harm of distractors. Several strong models remain  $\rho$ -invariant (e.g., gpt-5, o3;  $p_{\text{LR}} > 0.2$ ), and DS-Llama-70B is marginal ( $p_{\text{LR}} = 0.055$ ).
- The  $N \times \rho$  interaction is model-dependent and less ubiquitous (significant in 4/22). Two qualitatively distinct regimes appear: for some mid-tier models the coefficient is positive and significant (Qwen3-30B-A3B:  $+1.16$ ,  $p_{\text{LR}} = 7.18\text{e-}5$ ; EXAONE-Deep-32B:  $+0.56$ ,  $p_{\text{LR}} = 0.038$ ), indicating that increasing the needle ratio attenuates length-related degradation (i.e., more signal per distractor helps especially on longer sequences). In contrast, other models show a negative and significant  $N \times \rho$  (DS-Qwen-7B:  $-0.81$ ,  $p_{\text{LR}} = 0.0025$ ; gemini-2.5-pro:  $-8.61$ ,  $p_{\text{LR}} = 0.0021$ ), consistent with long contexts amplifying sensitivity to distractors. Several additional models exhibit borderline positive evidence ( $0.05 < p_{\text{LR}} < 0.10$ ; e.g., Qwen3-32B, Qwen3-8B).

### B.2 Three-way effects

A positive three-way interaction  $d \times N \times \rho$  is significant in 12/22 models (e.g., DS-Qwen-32B:  $+0.36$ ,  $p_{\text{LR}} = 8.1\text{e-}13$ ; Phi-4-mini-reasoning:  $+0.30$ ,  $p_{\text{LR}} = 1.1\text{e-}8$ ; QwQ-32B:  $+0.36$ ,  $p_{\text{LR}} = 3.7\text{e-}12$ ). Given the quadratic main effect in  $\rho$ , this should be read as a moderation of the *slope* with respect to  $\rho$ : when tasks are simultaneously long and intrinsically complex, changes in  $\rho$  tend to have a larger beneficial marginal effect (i.e., increasing the share of needle statements mitigates the compounded  $d \times N$  burden more than when only one of  $d$  or  $N$  is high). Frontier models show near-zero or slightly negative three-way coefficients (gpt-5:  $-1.05$ ,  $p_{\text{LR}} = 0.076$ ; o3:  $-0.62$ ,  $p_{\text{LR}} = 0.092$ ), aligning with their weak  $\rho$ -dependence overall.

| Model                         | $\beta_{d \times N}$ | $p_{LR}(d \times N)$ | $\beta_{d \times \rho}$ | $p_{LR}(d \times \rho)$ | $\beta_{N \times \rho}$ | $p_{LR}(N \times \rho)$ | $\beta_{d \times N \times \rho}$ | $p_{LR}(d \times N \times \rho)$ |
|-------------------------------|----------------------|----------------------|-------------------------|-------------------------|-------------------------|-------------------------|----------------------------------|----------------------------------|
| DeepSeek-R1-0528              | -0.03                | 0.864                | 0.07                    | 0.89                    | 1.41                    | 0.421                   | -0.00                            | 0.997                            |
| DeepSeek-R1-Distill-Llama-70B | -0.15                | $3.41e-05^{***}$     | -0.21                   | 0.0552                  | 0.28                    | 0.433                   | 0.14                             | 0.014*                           |
| DeepSeek-R1-Distill-Qwen-1.5B | -0.01                | 0.706                | -0.15                   | 0.195                   | -0.25                   | 0.402                   | 0.08                             | 0.211                            |
| DeepSeek-R1-Distill-Qwen-32B  | -0.37                | $4.07e-32^{***}$     | -0.79                   | $1.84e-17^{***}$        | -0.11                   | 0.702                   | 0.36                             | $8.14e-13^{***}$                 |
| DeepSeek-R1-Distill-Qwen-7B   | -0.16                | $7.63e-07^{***}$     | -0.51                   | $1.41e-07^{***}$        | -0.81                   | 0.00246**               | 0.26                             | $9.41e-07^{***}$                 |
| EXAONE-Deep-32B               | -0.27                | $1.28e-17^{***}$     | -0.89                   | $2.73e-20^{***}$        | 0.56                    | 0.0378*                 | 0.42                             | $2.12e-15^{***}$                 |
| Phi-4-mini-reasoning          | -0.13                | $4.96e-05^{***}$     | -0.62                   | $2.44e-10^{***}$        | -0.04                   | 0.886                   | 0.30                             | $1.08e-08^{***}$                 |
| Phi-4-reasoning               | -0.45                | $1.94e-30^{***}$     | -0.50                   | $2.66e-05^{***}$        | 0.59                    | 0.0917                  | 0.18                             | 0.00696**                        |
| Phi-4-reasoning-plus          | -0.41                | $4.28e-25^{***}$     | -0.39                   | 0.000821**              | 0.54                    | 0.124                   | 0.15                             | 0.0199*                          |
| QwQ-32B                       | -0.39                | $1.25e-33^{***}$     | -0.96                   | $3.77e-23^{***}$        | -0.13                   | 0.652                   | 0.36                             | $3.72e-12^{***}$                 |
| Qwen3-1.7B                    | -0.20                | $7.33e-11^{***}$     | -0.56                   | $7.48e-09^{***}$        | 0.04                    | 0.887                   | 0.27                             | $3.55e-07^{***}$                 |
| Qwen3-30B-A3B                 | -0.19                | $4.57e-09^{***}$     | -0.25                   | 0.00919**               | 1.16                    | $7.18e-05^{***}$        | 0.08                             | 0.134                            |
| Qwen3-32B                     | -0.22                | $1.76e-10^{***}$     | -0.56                   | $6.88e-08^{***}$        | 0.53                    | 0.0965                  | 0.21                             | 0.000104**                       |
| Qwen3-8B                      | -0.24                | $6.63e-14^{***}$     | -0.46                   | $8.97e-07^{***}$        | 0.50                    | 0.0767                  | 0.21                             | $5.36e-05^{***}$                 |
| gemini-2.5-flash              | -0.58                | 0.0041**             | -0.31                   | 0.681                   | -3.05                   | 0.133                   | 0.16                             | 0.67                             |
| gemini-2.5-flash-lite         | -0.27                | 0.00554**            | -0.79                   | 0.00686**               | -1.20                   | 0.171                   | 0.31                             | 0.0582                           |
| gemini-2.5-pro                | -1.84                | $7.81e-08^{***}$     | -3.53                   | 0.00601**               | -8.61                   | 0.00211**               | 1.61                             | 0.00891**                        |
| gpt-5-2025-08-07              | -0.13                | 0.685                | 1.41                    | 0.276                   | 5.23                    | 0.197                   | -1.05                            | 0.0762                           |
| gpt-5-mini-2025-08-07         | -0.56                | 0.00034**            | 0.01                    | 0.985                   | 0.48                    | 0.756                   | -0.06                            | 0.838                            |
| gpt-5-nano-2025-08-07         | -0.09                | 0.393                | -0.03                   | 0.929                   | 1.82                    | 0.0603                  | -0.10                            | 0.569                            |
| o3-2025-04-16                 | -0.19                | 0.353                | 1.00                    | 0.212                   | 1.72                    | 0.431                   | -0.62                            | 0.0922                           |
| o4-mini-2025-04-16            | -0.45                | 0.00829**            | 0.12                    | 0.856                   | -0.05                   | 0.979                   | -0.07                            | 0.81                             |

Table 1: Interaction analysis across intrinsic difficulty  $d$ , effective length  $\log_{10} N$ , and needle ratio  $\rho$ . Coefficients ( $\beta$ ) are from a per-model logistic GLM with all pairwise and 3-way interactions plus a quadratic main effect for  $\rho$ ;  $p_{LR}$  are likelihood-ratio p-values from dropping each interaction from the full model. Stars: \*\*\*  $p < 0.001$ , \*\*  $p < 0.01$ , \*  $p < 0.05$ .

### B.3 Practical implications

Beyond main-effect sensitivities, many models exhibit genuine interaction structure: high  $d$  and high  $N$  *jointly* depress accuracy more than additively, and high  $d$  *amplifies* distractor harm ( $d \times \rho < 0$ ). For a substantial subset of models, increasing the needle share ( $\rho$ ) yields greater gains specifically when tasks are both long and complex (positive  $d \times N \times \rho$ ), providing a concrete knob for mitigating compounded failure modes. It is important to note however that for models with long-context budget issues (e.g., gemini-2.5-pro; see Appendix F),  $N \times \rho$  estimates can be dominated by those failures, inflating effect sizes.

## C Model performance with Error-Bars

Due the small size and the large amount of models we compare in Figure 1 of the main paper we omit error-bars to improve legibility. In this section we plot larger versions of the charts in the panel with vertical error bars representing 90% confidence intervals for the mean accuracy of each model-condition pair.

We compute these confidence intervals with the Wilson score method for a binomial proportion. Specifically, for a given point with  $k$  correct answers out of  $n$  trials we set  $\hat{p} = k/n$  and use the 90 % standard-normal quantile  $z = 1.644853627$  to obtain

$$[l, u] = \frac{\hat{p} + \frac{z^2}{2n} \pm z \sqrt{\frac{\hat{p}(1-\hat{p}) + z^2/(4n)}{n}}}{1 + \frac{z^2}{n}}.$$

The resulting interval  $[l, u]$  marks the range that would contain the true underlying accuracy in 90% of repeated experiments with the same sample size. Wider bars correspond to greater sampling uncertainty, whereas tighter bars

indicate more stable estimates.

The narrow error bars we observe substantiate the discussion of the results in the main paper and highlights a significant difference between the curves at 90% significance and the presence of the characteristic U-shape.

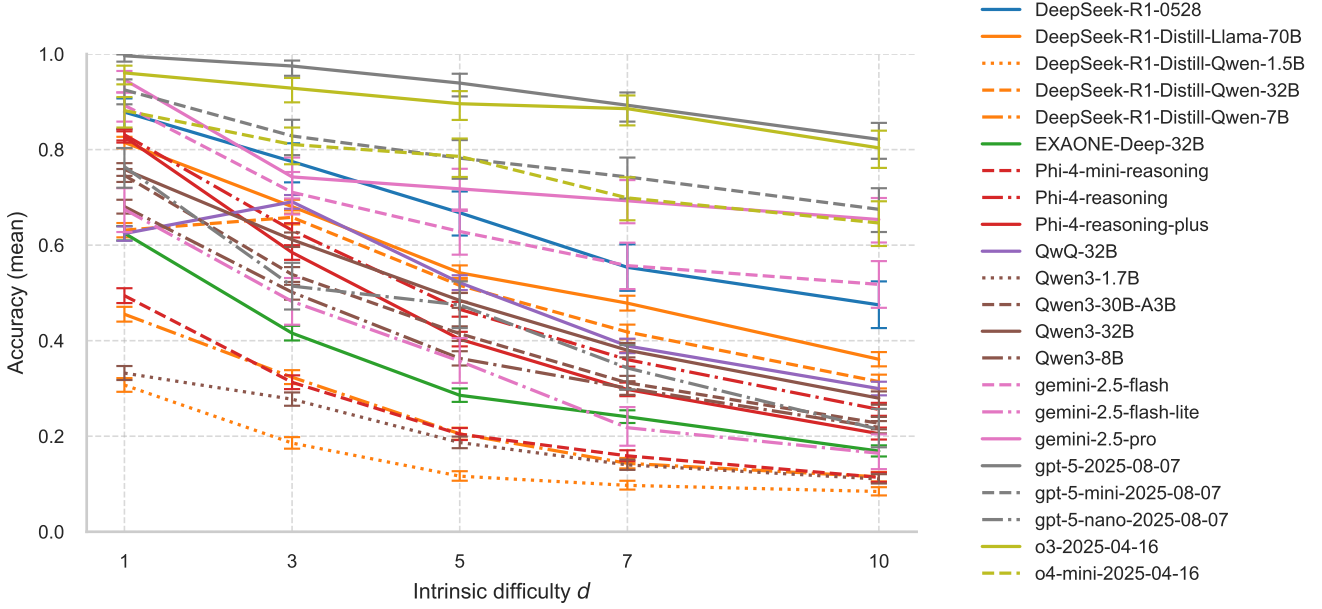

Figure 3: Accuracy relative to difficulty  $d$  for  $d \in \{1, 3, 5, 7, 10\}$  on the X-Axis

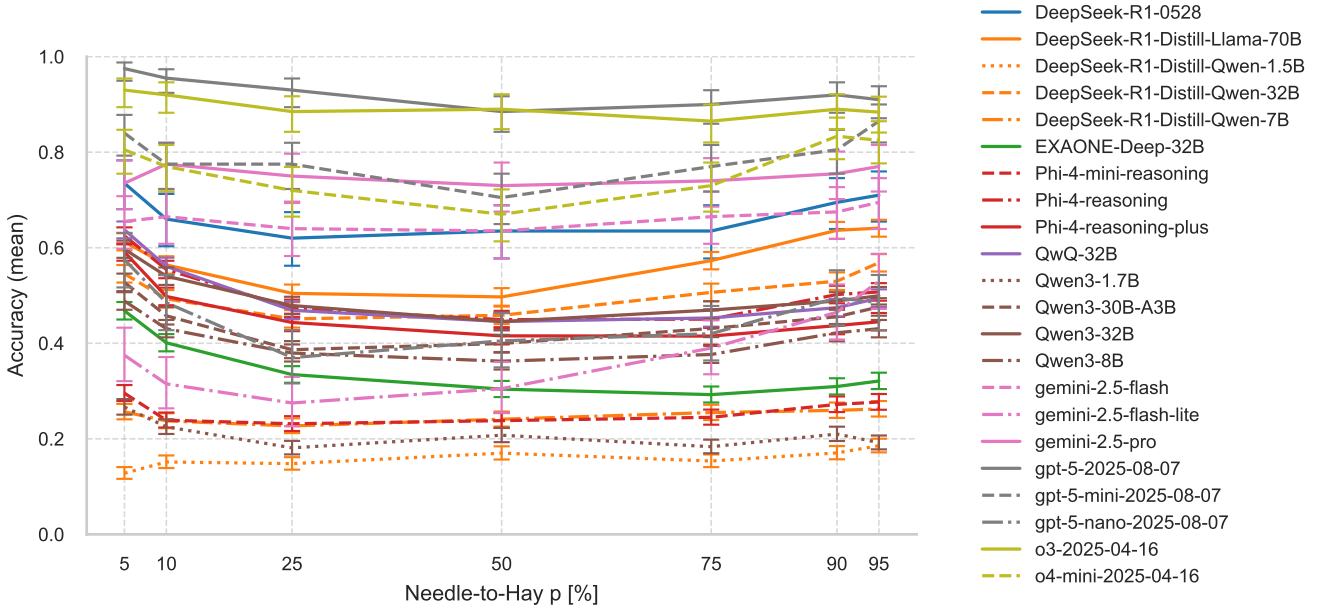

Figure 4: Accuracy relative to distractor-ratio  $\rho$  for  $\rho \in \{5, 10, 25, 50, 75, 90, 95\}$  on the X-Axis

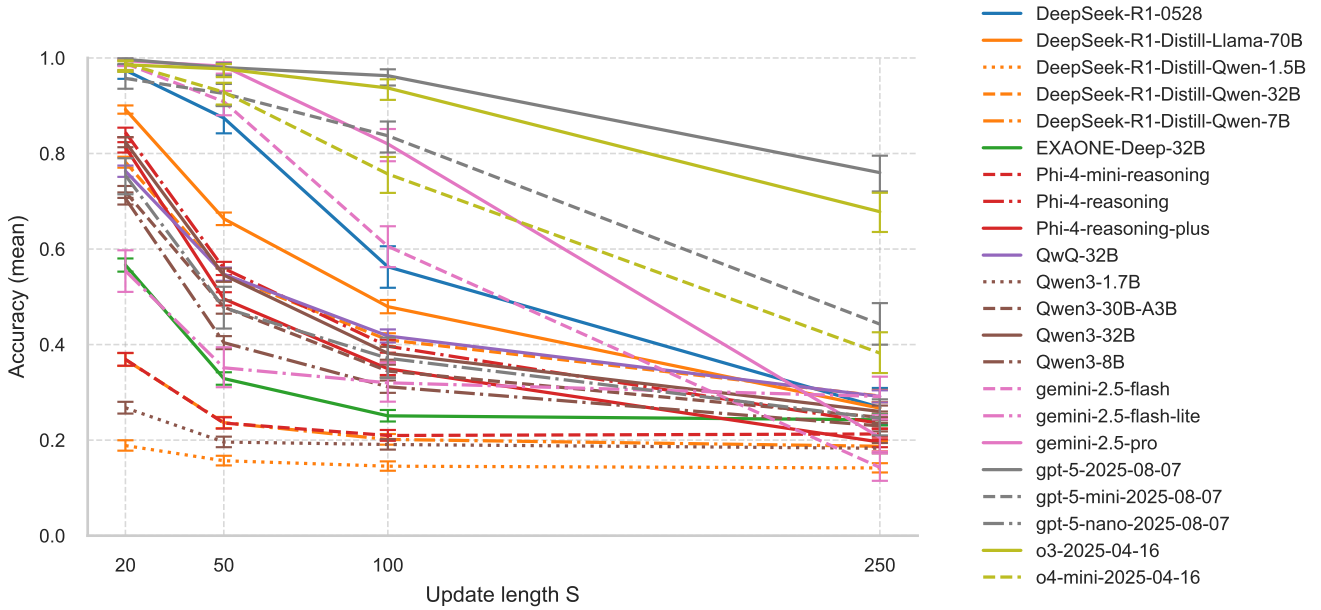

Figure 5: Accuracy relative to total statement length  $N$  for  $N \in \{20, 50, 100, 250\}$  on the X-Axis

## D Evaluation, scoring pipeline, and error taxonomy

This section fully details the evaluation and scoring pipeline functionally in text and in pseudo code.

### D.1 Inputs, files, and naming

The scorer consumes three artefacts per puzzle instance  $z$ :

1. Model output of the reasoning trace + response (plain text).
2. Puzzle text (for the question): The last line is the natural-language question.
3. Puzzle metadata (JSON state): providing the person-of-interest (PoI), gold label, needles, difficulty, statement count, and category domains.

### D.2 Category mapping and qualifiers

The target category is resolved from the last line question using deterministic templates:

- `startswith("Where is")` → `location`
- `startswith("What color shirt")` → `clothes_shirt`
- `startswith("What color pant")` → `clothes_pant`
- `startswith("What color hat")` → `clothes_hat`
- `startswith("What color of socks")` → `clothes_socks`
- `startswith("What color of gloves")` → `clothes_gloves`

- `startswith("What color of underwear") → clothes_underwear`
- `startswith("What is the final hair color") → hair`
- `endswith("most recently eat?") → recent_eat`
- `endswith("recently watch?") → recent_watch`
- `endswith("recently listen to?") → recent_listen`
- `endswith("recently read?") → recent_read`

Qualifiers (used to find a “valid PoI sentence”):

- `location: {at, located, in}`
- `clothes_shirt: {shirt, wear}; clothes_pant: {pant, wear}; clothes_hat: {hat, wear}; clothes_gloves: {glove, wear}; clothes_socks: {sock, wear}; clothes_underwear: {underwear, wear}`
- `hair: {hair}`
- `recent_eat: {eat, ate}; recent_watch: {watch, watched, movie}; recent_listen: {listen, listened, music}; recent_read: {read, book}`

The PoI name and the domain values for the target category are read from the puzzle metadata file.

### D.3 Normalization, sentence windows, and context budget

Normalization:

- Lowercase the full model output; split by newlines.
- If the last line starts with “(” and ends with “)”, drop that line because it’s usually just a clarification that follows the final answer.
- Drop empty lines; if no lines remain, keep a single empty line.

Sentence windows:

1. **valid\_poi\_last\_sentence**: last line containing PoI and any category qualifier; take `TakeLastSentence`.
2. **poi\_last\_sentence**: last line containing PoI; take `TakeLastSentence` of that line.
3. **last\_sentence**: apply `TakeLastSentence` to the last remaining line; see below.

`TakeLastSentence(s)`: let  $p = \text{split}(s, ".")$ . If  $\text{len}(p) \geq 2$ , return  $p[-2]$ ; else return  $s$ .

Context limit failure: we mark `wrong_max_context` if any of the following holds:

$$\text{prompt\_tokens} + \text{response\_tokens} + 20 \geq 32'768, \quad \text{or} \quad \text{last\_sentence} = "", \quad \text{or} \quad \text{empty output.}$$

The 20 additional tokens added to the `response_tokens` is necessary because when models usually produce incomplete responses a few tokens before the maximum-output-token limit they were prompted to decode with.

## D.4 Matching, synonyms, and alternatives

Since some models respond with the answer attribute starting with a special character instead of an empty space (like a word) the containment accepts the following alternative word boundaries (code `CheckAnswer(term, sentence)` returns true if any holds):

- `sentence.startswith(term)` or `sentence == term`
- substring appears prefixed by one of: space, “[”, “””, “\*”, “\_”, “{”, “(”

Since some attributes in the attribute taxonomy could be spelled alternatively, we relax Synonym whitelist for them in the evaluation (code `CheckCorrectAnswer(gold, sentence)`):

- `reggae`: accept `reggae` or `reggae`
- `sci-fi`: accept `sci-fi`, `science fiction`, `science-fiction`
- `camp`: accept `camp`, `campground`
- `potatoes`: accept `potatoes`, `potato`
- `market`: accept `market`, `marketplace`
- `livingroom`: accept `livingroom`, `living room`
- otherwise: accept exactly `gold` by boundary-tolerant containment

We further ensure no alternative value is present in the last sentence and therefore compute (`AltFlag(sentence, alts, gold)`) as:

1. Let  $s = \text{lowercase}(\text{sentence})$ ,  $g = \text{lowercase}(\text{gold})$ , and  $A = \text{lowercase alternatives} = \text{domain values} \setminus \{g\}$ .
2. Define `present(t) = CheckCorrectAnswer(t, s)`.
3. If no alternative is present, return false.
4. If both `gold` and at least one alternative are present, keep the alternative flag only if some alternative’s character span encloses the `gold`’s span in  $s$  (“spans” test); otherwise clear the flag. This is done to accommodate attribute values like ‘non-fiction’ which contain alternative values like ‘fiction’.
5. Since sometimes models respond by mentioning also previous value of the attribute (eg a sentence like “... the final step explicitly converts gray to green, resulting in **green**”) we do not set the flag if the `gold` flag is the last mentioned attribute in the sentence.

## D.5 Buckets, precedence, and accuracy

Let:

```
c_valid = CheckCorrectAnswer(gold, valid_poi_last_sentence),
c_poi = CheckCorrectAnswer(gold, poi_last_sentence),
c_last = CheckCorrectAnswer(gold, last_sentence),
a_valid = AltFlag(valid_poi_last_sentence, alts, gold),
a_poi = AltFlag(poi_last_sentence, alts, gold),
a_last = AltFlag(last_sentence, alts, gold).
```

Classification (first applicable wins):

1. if  $c_{\text{valid}}$  and not  $a_{\text{valid}}$ : `correct_valid`
2. else if  $c_{\text{poi}}$  and not  $a_{\text{poi}}$ : `correct_poi`
3. else if  $c_{\text{last}}$  and not  $a_{\text{last}}$ : `correct_last_sentence`
4. else if not  $c_{\text{valid}}$  and  $a_{\text{valid}}$  and `valid_poi_last_sentence`  $\neq$  `""`: `wrong_logic`
5. else if not  $c_{\text{poi}}$  and  $a_{\text{poi}}$  and `poi_last_sentence`  $\neq$  `""`: `wrong_logic_poi`
6. else if not  $c_{\text{last}}$  and  $a_{\text{last}}$  and `last_sentence`  $\neq$  `""`: `wrong_logic_last_sentence`
7. else: `wrong_other`

Note: When a sentence contains both gold and an alternative that spans the gold, this does not trigger a `wrong_logic*` bucket unless the corresponding “not  $c_{\cdot}$  and  $a_{\cdot}$ ” guard holds; such cases can fall through to `wrong_other`, matching the implementation. The main figures/regressions of the paper use accuracy with `correct`  $\in$  `{correct_valid, correct_poi, correct_last_sentence}` and `correct` as the complement.

## D.6 Pseudocode

Using pseudo code, figure 1 explains the data preparation, figure 2 explains the scoring of the results and success/failure types, and figure 3 details the used utility functions.

---

**Algorithm 1:** Pseudocode of the data preparation.

---

```

// Parse identifiers and gold from puzzle name: N.d.needles.puzzleId.gold
(N, d, needles, puzzleId, gold)  $\leftarrow$  PARSE(ans_path);
// Load question and resolve category
question  $\leftarrow$  LAST_LINE(puzzle_txt_path);
category  $\leftarrow$  MapQuestionToCategory(question);
// Load metadata needed for evaluation
(poi, domains)  $\leftarrow$  READJSON(state_json_path);
poi  $\leftarrow$  LOWER(poi); domainValues  $\leftarrow$  domains[category];
quals  $\leftarrow$  GetQualifiersFor(category);
// Read and normalize model output
resp  $\leftarrow$  READ(ans_path);
lines  $\leftarrow$  SPLIT_LINES(LOWER(resp));
if STARTSWITH(lines[-1], "(")  $\wedge$  ENDSWITH(lines[-1], ")") then
   $\lfloor$  DROP_LAST(lines)

lines  $\leftarrow$  FILTER_NONEMPTY(lines);
if LEN(lines) = 0 then
   $\lfloor$  lines  $\leftarrow$  [""]
```

---

## E Error distribution

The following tables illustrate the error-type distribution per difficulty 2, and length 3. The purpose of this distinction is to illustrate three primary error types (i.e., long context error, logic error, other error) and to distinguish among the logic errors how well the model followed the instruction in its response formatting. The other error captures cases where the model responds but doesn’t mention any attribute, usually this is cases where the model erroneously

assumes the problem can't be solved with the provided information. For conciseness the error types in the table headers are abbreviated as following:

- Wrong max-context  $\rightarrow$  ctx
- Wrong logic (last valid POI sentence)  $\rightarrow$  valid-logic
- Wrong logic (last POI sentence)  $\rightarrow$  poi-logic
- Wrong logic (last sentence)  $\rightarrow$  last-logic
- Wrong other  $\rightarrow$  other

If the total number of evaluated samples does not precisely match the expected number of samples (e.g 'o3-2025-04-16' with difficulty 5 resulted in 279 vs 280 expected examples), this usually indicates the puzzle was not processed due to a an API error (e.g. a security refusal). These few missing cases were attempted to be evaluated a second time but refused again.

Table 2: Error-type distribution by difficulty  $d$  per model (aggregated over  $N$  and  $\rho$ ).

| Model                         | Dim | Samples | Acc [%] | ctx | valid-logic | poi-logic | last-logic | other |
|-------------------------------|-----|---------|---------|-----|-------------|-----------|------------|-------|
| DeepSeek-R1-0528              | 1   | 280     | 88      | 3   | 31          | 0         | 0          | 0     |
| DeepSeek-R1-0528              | 3   | 280     | 78      | 11  | 52          | 0         | 0          | 0     |
| DeepSeek-R1-0528              | 5   | 280     | 67      | 13  | 80          | 0         | 0          | 0     |
| DeepSeek-R1-0528              | 7   | 280     | 55      | 16  | 109         | 0         | 0          | 0     |
| DeepSeek-R1-0528              | 10  | 280     | 48      | 19  | 128         | 0         | 0          | 0     |
| DeepSeek-R1-Distill-Llama-70B | 1   | 2800    | 82      | 0   | 507         | 0         | 2          | 9     |
| DeepSeek-R1-Distill-Llama-70B | 3   | 2800    | 68      | 11  | 877         | 0         | 3          | 3     |
| DeepSeek-R1-Distill-Llama-70B | 5   | 2800    | 54      | 12  | 1260        | 0         | 8          | 2     |
| DeepSeek-R1-Distill-Llama-70B | 7   | 2800    | 48      | 28  | 1424        | 0         | 4          | 4     |
| DeepSeek-R1-Distill-Llama-70B | 10  | 2800    | 36      | 33  | 1747        | 0         | 4          | 5     |
| DeepSeek-R1-Distill-Qwen-1.5B | 1   | 2800    | 31      | 561 | 1140        | 4         | 81         | 154   |
| DeepSeek-R1-Distill-Qwen-1.5B | 3   | 2800    | 19      | 543 | 1305        | 3         | 82         | 347   |
| DeepSeek-R1-Distill-Qwen-1.5B | 5   | 2800    | 12      | 613 | 1381        | 4         | 63         | 413   |
| DeepSeek-R1-Distill-Qwen-1.5B | 7   | 2800    | 10      | 695 | 1323        | 7         | 60         | 443   |
| DeepSeek-R1-Distill-Qwen-1.5B | 10  | 2800    | 8       | 717 | 1371        | 7         | 62         | 407   |
| DeepSeek-R1-Distill-Qwen-32B  | 1   | 2800    | 63      | 1   | 1023        | 0         | 3          | 5     |
| DeepSeek-R1-Distill-Qwen-32B  | 3   | 2800    | 66      | 46  | 908         | 0         | 2          | 1     |
| DeepSeek-R1-Distill-Qwen-32B  | 5   | 2800    | 52      | 78  | 1275        | 0         | 1          | 2     |
| DeepSeek-R1-Distill-Qwen-32B  | 7   | 2800    | 42      | 94  | 1532        | 0         | 0          | 3     |
| DeepSeek-R1-Distill-Qwen-32B  | 10  | 2800    | 31      | 106 | 1813        | 0         | 0          | 1     |
| DeepSeek-R1-Distill-Qwen-7B   | 1   | 2800    | 46      | 47  | 1454        | 5         | 4          | 15    |
| DeepSeek-R1-Distill-Qwen-7B   | 3   | 2800    | 32      | 124 | 1561        | 5         | 70         | 134   |
| DeepSeek-R1-Distill-Qwen-7B   | 5   | 2800    | 20      | 246 | 1706        | 3         | 65         | 206   |
| DeepSeek-R1-Distill-Qwen-7B   | 7   | 2800    | 14      | 317 | 1802        | 8         | 49         | 223   |
| DeepSeek-R1-Distill-Qwen-7B   | 10  | 2800    | 12      | 352 | 1770        | 6         | 60         | 290   |
| EXAONE-Deep-32B               | 1   | 2800    | 62      | 0   | 995         | 5         | 2          | 48    |
| EXAONE-Deep-32B               | 3   | 2800    | 42      | 2   | 1595        | 2         | 27         | 10    |
| EXAONE-Deep-32B               | 5   | 2800    | 29      | 10  | 1938        | 2         | 45         | 5     |
| EXAONE-Deep-32B               | 7   | 2800    | 24      | 14  | 2060        | 1         | 42         | 9     |
| EXAONE-Deep-32B               | 10  | 2800    | 17      | 16  | 2257        | 1         | 40         | 13    |

Table 2: Error-type distribution by difficulty  $d$  per model (aggregated over  $N$  and  $\rho$ ). (continued)

| Model                 | Dim | Samples | Acc [%] | ctx | valid-logic | poi-logic | last-logic | other |
|-----------------------|-----|---------|---------|-----|-------------|-----------|------------|-------|
| gemini-2.5-flash      | 1   | 280     | 89      | 6   | 24          | 0         | 0          | 0     |
| gemini-2.5-flash      | 3   | 280     | 71      | 64  | 17          | 0         | 0          | 0     |
| gemini-2.5-flash      | 5   | 280     | 63      | 93  | 11          | 0         | 0          | 0     |
| gemini-2.5-flash      | 7   | 280     | 56      | 116 | 8           | 0         | 0          | 0     |
| gemini-2.5-flash      | 10  | 280     | 52      | 110 | 25          | 0         | 0          | 0     |
| gemini-2.5-flash-lite | 1   | 280     | 68      | 0   | 91          | 0         | 0          | 0     |
| gemini-2.5-flash-lite | 3   | 280     | 48      | 5   | 138         | 0         | 0          | 2     |
| gemini-2.5-flash-lite | 5   | 280     | 36      | 3   | 176         | 0         | 0          | 1     |
| gemini-2.5-flash-lite | 7   | 280     | 22      | 8   | 209         | 0         | 0          | 2     |
| gemini-2.5-flash-lite | 10  | 280     | 16      | 1   | 227         | 2         | 0          | 4     |
| gemini-2.5-pro        | 1   | 280     | 95      | 10  | 5           | 0         | 0          | 0     |
| gemini-2.5-pro        | 3   | 280     | 74      | 69  | 3           | 0         | 0          | 0     |
| gemini-2.5-pro        | 5   | 280     | 72      | 71  | 8           | 0         | 0          | 0     |
| gemini-2.5-pro        | 7   | 280     | 69      | 79  | 7           | 0         | 0          | 0     |
| gemini-2.5-pro        | 10  | 280     | 65      | 88  | 9           | 0         | 0          | 0     |
| gpt-5-2025-08-07      | 1   | 280     | 100     | 0   | 1           | 0         | 0          | 0     |
| gpt-5-2025-08-07      | 3   | 280     | 98      | 0   | 7           | 0         | 0          | 0     |
| gpt-5-2025-08-07      | 5   | 280     | 94      | 0   | 17          | 0         | 0          | 0     |
| gpt-5-2025-08-07      | 7   | 280     | 89      | 3   | 26          | 0         | 0          | 1     |
| gpt-5-2025-08-07      | 10  | 280     | 82      | 29  | 21          | 0         | 0          | 0     |
| gpt-5-mini-2025-08-07 | 1   | 280     | 92      | 0   | 14          | 0         | 0          | 7     |
| gpt-5-mini-2025-08-07 | 3   | 280     | 83      | 0   | 46          | 0         | 0          | 2     |
| gpt-5-mini-2025-08-07 | 5   | 280     | 78      | 3   | 52          | 0         | 1          | 5     |
| gpt-5-mini-2025-08-07 | 7   | 280     | 74      | 12  | 58          | 0         | 0          | 2     |
| gpt-5-mini-2025-08-07 | 10  | 280     | 68      | 27  | 63          | 0         | 0          | 1     |
| gpt-5-nano-2025-08-07 | 1   | 280     | 76      | 0   | 65          | 1         | 0          | 0     |
| gpt-5-nano-2025-08-07 | 3   | 280     | 51      | 0   | 133         | 0         | 3          | 0     |
| gpt-5-nano-2025-08-07 | 5   | 280     | 48      | 0   | 145         | 0         | 2          | 0     |
| gpt-5-nano-2025-08-07 | 7   | 280     | 34      | 0   | 183         | 0         | 1          | 0     |
| gpt-5-nano-2025-08-07 | 10  | 280     | 21      | 0   | 219         | 0         | 1          | 0     |
| o3-2025-04-16         | 1   | 279     | 96      | 0   | 11          | 0         | 0          | 0     |
| o3-2025-04-16         | 3   | 280     | 93      | 0   | 20          | 0         | 0          | 0     |
| o3-2025-04-16         | 5   | 279     | 90      | 1   | 28          | 0         | 0          | 0     |
| o3-2025-04-16         | 7   | 280     | 89      | 2   | 30          | 0         | 0          | 0     |
| o3-2025-04-16         | 10  | 280     | 80      | 21  | 34          | 0         | 0          | 0     |
| o4-mini-2025-04-16    | 1   | 279     | 88      | 0   | 31          | 0         | 0          | 2     |
| o4-mini-2025-04-16    | 3   | 280     | 81      | 0   | 53          | 0         | 0          | 0     |
| o4-mini-2025-04-16    | 5   | 280     | 79      | 3   | 57          | 0         | 0          | 0     |
| o4-mini-2025-04-16    | 7   | 279     | 70      | 5   | 78          | 0         | 0          | 1     |
| o4-mini-2025-04-16    | 10  | 280     | 65      | 13  | 86          | 0         | 0          | 0     |
| Phi-4-mini-reasoning  | 1   | 2800    | 49      | 4   | 1222        | 16        | 48         | 126   |
| Phi-4-mini-reasoning  | 3   | 2800    | 31      | 1   | 1613        | 6         | 126        | 178   |
| Phi-4-mini-reasoning  | 5   | 2800    | 20      | 12  | 1733        | 8         | 286        | 189   |
| Phi-4-mini-reasoning  | 7   | 2800    | 16      | 7   | 1785        | 6         | 354        | 203   |
| Phi-4-mini-reasoning  | 10  | 2800    | 11      | 18  | 1856        | 5         | 415        | 187   |
| Phi-4-reasoning       | 1   | 2800    | 83      | 14  | 417         | 0         | 0          | 42    |

Table 2: Error-type distribution by difficulty  $d$  per model (aggregated over  $N$  and  $\rho$ ). (continued)

| Model                | Dim | Samples | Acc [%] | ctx  | valid-logic | poi-logic | last-logic | other |
|----------------------|-----|---------|---------|------|-------------|-----------|------------|-------|
| Phi-4-reasoning      | 3   | 2800    | 63      | 79   | 921         | 0         | 0          | 33    |
| Phi-4-reasoning      | 5   | 2800    | 47      | 246  | 1219        | 1         | 0          | 30    |
| Phi-4-reasoning      | 7   | 2800    | 36      | 522  | 1240        | 0         | 0          | 29    |
| Phi-4-reasoning      | 10  | 2800    | 26      | 857  | 1200        | 1         | 0          | 25    |
| Phi-4-reasoning-plus | 1   | 2800    | 83      | 100  | 347         | 1         | 0          | 37    |
| Phi-4-reasoning-plus | 3   | 2800    | 58      | 182  | 938         | 0         | 0          | 43    |
| Phi-4-reasoning-plus | 5   | 2800    | 40      | 471  | 1153        | 1         | 0          | 46    |
| Phi-4-reasoning-plus | 7   | 2800    | 30      | 936  | 1001        | 2         | 0          | 27    |
| Phi-4-reasoning-plus | 10  | 2800    | 21      | 1198 | 994         | 0         | 1          | 32    |
| Qwen3-1.7B           | 1   | 2800    | 33      | 1    | 1840        | 1         | 11         | 17    |
| Qwen3-1.7B           | 3   | 2800    | 28      | 0    | 2010        | 0         | 2          | 11    |
| Qwen3-1.7B           | 5   | 2800    | 19      | 0    | 2268        | 0         | 1          | 8     |
| Qwen3-1.7B           | 7   | 2800    | 14      | 0    | 2396        | 0         | 2          | 10    |
| Qwen3-1.7B           | 10  | 2798    | 11      | 0    | 2483        | 0         | 1          | 5     |
| Qwen3-30B-A3B        | 1   | 2800    | 75      | 18   | 652         | 3         | 0          | 38    |
| Qwen3-30B-A3B        | 3   | 2800    | 54      | 48   | 1237        | 1         | 0          | 6     |
| Qwen3-30B-A3B        | 5   | 2800    | 41      | 40   | 1587        | 2         | 0          | 10    |
| Qwen3-30B-A3B        | 7   | 2800    | 31      | 25   | 1894        | 2         | 0          | 6     |
| Qwen3-30B-A3B        | 10  | 2800    | 23      | 19   | 2133        | 3         | 1          | 8     |
| Qwen3-32B            | 1   | 2800    | 76      | 0    | 626         | 0         | 1          | 49    |
| Qwen3-32B            | 3   | 2800    | 61      | 1    | 1075        | 1         | 1          | 10    |
| Qwen3-32B            | 5   | 2800    | 48      | 0    | 1434        | 1         | 3          | 6     |
| Qwen3-32B            | 7   | 2800    | 38      | 0    | 1721        | 0         | 6          | 9     |
| Qwen3-32B            | 10  | 2800    | 28      | 1    | 1994        | 0         | 12         | 10    |
| Qwen3-8B             | 1   | 2800    | 68      | 77   | 739         | 2         | 0          | 76    |
| Qwen3-8B             | 3   | 2800    | 50      | 136  | 1190        | 3         | 18         | 49    |
| Qwen3-8B             | 5   | 2800    | 36      | 106  | 1619        | 3         | 19         | 37    |
| Qwen3-8B             | 7   | 2800    | 30      | 101  | 1791        | 0         | 27         | 39    |
| Qwen3-8B             | 10  | 2800    | 22      | 78   | 2046        | 0         | 39         | 25    |
| QwQ-32B              | 1   | 2800    | 62      | 2    | 1044        | 1         | 0          | 5     |
| QwQ-32B              | 3   | 2800    | 69      | 12   | 850         | 0         | 3          | 1     |
| QwQ-32B              | 5   | 2800    | 52      | 52   | 1279        | 0         | 3          | 6     |
| QwQ-32B              | 7   | 2800    | 39      | 112  | 1596        | 0         | 1          | 2     |
| QwQ-32B              | 10  | 2800    | 30      | 273  | 1674        | 0         | 5          | 9     |

Table 3: Error-type distribution by puzzle length  $N$  per model (aggregated over  $d$  and  $\rho$ ).

| Model                         | Dim | Samples | Acc [%] | ctx | valid-logic | poi-logic | last-logic | other |
|-------------------------------|-----|---------|---------|-----|-------------|-----------|------------|-------|
| DeepSeek-R1-0528              | 20  | 350     | 97      | 7   | 2           | 0         | 0          | 0     |
| DeepSeek-R1-0528              | 50  | 350     | 87      | 14  | 30          | 0         | 0          | 0     |
| DeepSeek-R1-0528              | 100 | 350     | 56      | 25  | 128         | 0         | 0          | 0     |
| DeepSeek-R1-0528              | 250 | 350     | 27      | 16  | 240         | 0         | 0          | 0     |
| DeepSeek-R1-Distill-Llama-70B | 20  | 3500    | 89      | 0   | 372         | 0         | 1          | 4     |

Table 3: Error-type distribution by puzzle length  $N$  per model (aggregated over  $d$  and  $\rho$ ). (continued)

| Model                         | Dim | Samples | Acc [%] | ctx | valid-logic | poi-logic | last-logic | other |
|-------------------------------|-----|---------|---------|-----|-------------|-----------|------------|-------|
| DeepSeek-R1-Distill-Llama-70B | 50  | 3500    | 66      | 2   | 1167        | 0         | 4          | 5     |
| DeepSeek-R1-Distill-Llama-70B | 100 | 3500    | 48      | 2   | 1811        | 0         | 6          | 3     |
| DeepSeek-R1-Distill-Llama-70B | 250 | 3500    | 27      | 80  | 2465        | 0         | 10         | 11    |
| DeepSeek-R1-Distill-Qwen-1.5B | 20  | 3500    | 19      | 749 | 1676        | 8         | 58         | 349   |
| DeepSeek-R1-Distill-Qwen-1.5B | 50  | 3500    | 16      | 752 | 1749        | 5         | 85         | 360   |
| DeepSeek-R1-Distill-Qwen-1.5B | 100 | 3500    | 15      | 698 | 1749        | 4         | 90         | 450   |
| DeepSeek-R1-Distill-Qwen-1.5B | 250 | 3500    | 14      | 930 | 1346        | 8         | 115        | 605   |
| DeepSeek-R1-Distill-Qwen-32B  | 20  | 3500    | 78      | 1   | 760         | 0         | 0          | 2     |
| DeepSeek-R1-Distill-Qwen-32B  | 50  | 3500    | 55      | 1   | 1583        | 0         | 2          | 3     |
| DeepSeek-R1-Distill-Qwen-32B  | 100 | 3500    | 41      | 0   | 2061        | 0         | 1          | 3     |
| DeepSeek-R1-Distill-Qwen-32B  | 250 | 3500    | 29      | 323 | 2147        | 0         | 3          | 4     |
| DeepSeek-R1-Distill-Qwen-7B   | 20  | 3500    | 37      | 117 | 2012        | 4         | 14         | 63    |
| DeepSeek-R1-Distill-Qwen-7B   | 50  | 3500    | 24      | 207 | 2298        | 1         | 43         | 123   |
| DeepSeek-R1-Distill-Qwen-7B   | 100 | 3500    | 20      | 311 | 2177        | 11        | 75         | 221   |
| DeepSeek-R1-Distill-Qwen-7B   | 250 | 3500    | 19      | 451 | 1806        | 11        | 116        | 461   |
| EXAONE-Deep-32B               | 20  | 3500    | 57      | 7   | 1451        | 4         | 35         | 20    |
| EXAONE-Deep-32B               | 50  | 3500    | 33      | 17  | 2255        | 2         | 56         | 19    |
| EXAONE-Deep-32B               | 100 | 3500    | 25      | 7   | 2556        | 4         | 34         | 21    |
| EXAONE-Deep-32B               | 250 | 3500    | 24      | 11  | 2583        | 1         | 31         | 25    |
| gemini-2.5-flash              | 20  | 350     | 99      | 0   | 4           | 0         | 0          | 0     |
| gemini-2.5-flash              | 50  | 350     | 91      | 10  | 22          | 0         | 0          | 0     |
| gemini-2.5-flash              | 100 | 350     | 61      | 99  | 39          | 0         | 0          | 0     |
| gemini-2.5-flash              | 250 | 350     | 14      | 280 | 20          | 0         | 0          | 0     |
| gemini-2.5-flash-lite         | 20  | 350     | 55      | 0   | 154         | 0         | 0          | 2     |
| gemini-2.5-flash-lite         | 50  | 350     | 35      | 0   | 223         | 1         | 0          | 3     |
| gemini-2.5-flash-lite         | 100 | 350     | 32      | 1   | 235         | 0         | 0          | 2     |
| gemini-2.5-flash-lite         | 250 | 350     | 29      | 16  | 229         | 1         | 0          | 2     |
| gemini-2.5-pro                | 20  | 350     | 99      | 0   | 2           | 0         | 0          | 0     |
| gemini-2.5-pro                | 50  | 350     | 98      | 1   | 5           | 0         | 0          | 0     |
| gemini-2.5-pro                | 100 | 350     | 82      | 48  | 15          | 0         | 0          | 0     |
| gemini-2.5-pro                | 250 | 350     | 21      | 268 | 10          | 0         | 0          | 0     |
| gpt-5-2025-08-07              | 20  | 350     | 100     | 0   | 1           | 0         | 0          | 0     |
| gpt-5-2025-08-07              | 50  | 350     | 98      | 0   | 7           | 0         | 0          | 0     |
| gpt-5-2025-08-07              | 100 | 350     | 96      | 0   | 12          | 0         | 0          | 1     |
| gpt-5-2025-08-07              | 250 | 350     | 76      | 32  | 52          | 0         | 0          | 0     |
| gpt-5-mini-2025-08-07         | 20  | 350     | 96      | 0   | 12          | 0         | 0          | 3     |
| gpt-5-mini-2025-08-07         | 50  | 350     | 93      | 0   | 23          | 0         | 0          | 3     |
| gpt-5-mini-2025-08-07         | 100 | 350     | 84      | 0   | 54          | 0         | 0          | 3     |
| gpt-5-mini-2025-08-07         | 250 | 350     | 44      | 42  | 144         | 0         | 1          | 8     |
| gpt-5-nano-2025-08-07         | 20  | 350     | 75      | 0   | 86          | 0         | 0          | 0     |
| gpt-5-nano-2025-08-07         | 50  | 350     | 48      | 0   | 181         | 1         | 1          | 0     |
| gpt-5-nano-2025-08-07         | 100 | 350     | 37      | 0   | 217         | 0         | 3          | 0     |
| gpt-5-nano-2025-08-07         | 250 | 350     | 25      | 0   | 261         | 0         | 3          | 0     |
| o3-2025-04-16                 | 20  | 350     | 99      | 0   | 5           | 0         | 0          | 0     |
| o3-2025-04-16                 | 50  | 350     | 98      | 0   | 8           | 0         | 0          | 0     |
| o3-2025-04-16                 | 100 | 350     | 94      | 0   | 22          | 0         | 0          | 0     |

Table 3: Error-type distribution by puzzle length  $N$  per model (aggregated over  $d$  and  $\rho$ ). (continued)

| Model                | Dim | Samples | Acc [%] | ctx  | valid-logic | poi-logic | last-logic | other |
|----------------------|-----|---------|---------|------|-------------|-----------|------------|-------|
| o3-2025-04-16        | 250 | 348     | 68      | 24   | 88          | 0         | 0          | 0     |
| o4-mini-2025-04-16   | 20  | 350     | 99      | 0    | 3           | 0         | 0          | 1     |
| o4-mini-2025-04-16   | 50  | 350     | 93      | 0    | 24          | 0         | 0          | 1     |
| o4-mini-2025-04-16   | 100 | 350     | 76      | 0    | 85          | 0         | 0          | 0     |
| o4-mini-2025-04-16   | 250 | 348     | 38      | 21   | 193         | 0         | 0          | 1     |
| Phi-4-mini-reasoning | 20  | 3500    | 37      | 8    | 1765        | 7         | 213        | 215   |
| Phi-4-mini-reasoning | 50  | 3500    | 24      | 4    | 2163        | 11        | 289        | 208   |
| Phi-4-mini-reasoning | 100 | 3500    | 21      | 13   | 2198        | 6         | 327        | 222   |
| Phi-4-mini-reasoning | 250 | 3500    | 21      | 17   | 2083        | 17        | 400        | 238   |
| Phi-4-reasoning      | 20  | 3500    | 84      | 11   | 496         | 0         | 0          | 38    |
| Phi-4-reasoning      | 50  | 3500    | 56      | 106  | 1393        | 0         | 0          | 43    |
| Phi-4-reasoning      | 100 | 3500    | 40      | 332  | 1736        | 1         | 0          | 43    |
| Phi-4-reasoning      | 250 | 3500    | 24      | 1269 | 1372        | 1         | 0          | 35    |
| Phi-4-reasoning-plus | 20  | 3500    | 81      | 12   | 586         | 1         | 0          | 55    |
| Phi-4-reasoning-plus | 50  | 3500    | 50      | 382  | 1326        | 3         | 0          | 54    |
| Phi-4-reasoning-plus | 100 | 3500    | 35      | 668  | 1563        | 0         | 1          | 45    |
| Phi-4-reasoning-plus | 250 | 3500    | 20      | 1825 | 958         | 0         | 0          | 31    |
| Qwen3-1.7B           | 20  | 3500    | 27      | 0    | 2546        | 0         | 5          | 12    |
| Qwen3-1.7B           | 50  | 3500    | 20      | 1    | 2796        | 1         | 3          | 13    |
| Qwen3-1.7B           | 100 | 3500    | 19      | 0    | 2818        | 0         | 6          | 8     |
| Qwen3-1.7B           | 250 | 3498    | 18      | 0    | 2837        | 0         | 3          | 18    |
| Qwen3-30B-A3B        | 20  | 3500    | 72      | 25   | 942         | 1         | 1          | 12    |
| Qwen3-30B-A3B        | 50  | 3500    | 48      | 40   | 1764        | 2         | 0          | 19    |
| Qwen3-30B-A3B        | 100 | 3500    | 34      | 44   | 2228        | 1         | 0          | 21    |
| Qwen3-30B-A3B        | 250 | 3500    | 25      | 41   | 2569        | 7         | 0          | 16    |
| Qwen3-32B            | 20  | 3500    | 82      | 0    | 607         | 0         | 1          | 8     |
| Qwen3-32B            | 50  | 3500    | 55      | 1    | 1577        | 0         | 3          | 10    |
| Qwen3-32B            | 100 | 3500    | 38      | 0    | 2125        | 0         | 4          | 35    |
| Qwen3-32B            | 250 | 3500    | 26      | 1    | 2541        | 2         | 15         | 31    |
| Qwen3-8B             | 20  | 3500    | 71      | 75   | 912         | 0         | 18         | 24    |
| Qwen3-8B             | 50  | 3500    | 40      | 108  | 1893        | 1         | 31         | 53    |
| Qwen3-8B             | 100 | 3500    | 31      | 117  | 2198        | 3         | 27         | 64    |
| Qwen3-8B             | 250 | 3500    | 23      | 198  | 2382        | 4         | 27         | 85    |
| QwQ-32B              | 20  | 3500    | 76      | 8    | 810         | 0         | 4          | 7     |
| QwQ-32B              | 50  | 3500    | 55      | 27   | 1550        | 0         | 1          | 6     |
| QwQ-32B              | 100 | 3500    | 42      | 36   | 1991        | 0         | 5          | 5     |
| QwQ-32B              | 250 | 3500    | 29      | 380  | 2092        | 1         | 2          | 5     |

## F AIC-Comparison

In this section we compare the Akaike Information Criterion (AIC) of the GLM model containing a pure linear  $\rho$  term with a GLM model with a squared term added for  $\rho$ . The equations for the models are as following with  $Y = 1$  indicating a correctly solved puzzle:

## Linear model

$$\Pr(Y=1) = \sigma(\beta_0 + \beta_d d + \beta_N \log_{10} N + \beta_\rho \rho),$$

## Quadratic model

$$\Pr(Y=1) = \sigma(\beta_0 + \beta_d d + \beta_N \log_{10} N + \beta_\rho \rho + \beta_{\rho^2} \rho^2),$$

To assess whether the quadratic specification provides a statistically significant improvement over the linear GLM, we compare their maximised log-likelihoods  $\ell_{\text{lin}}$  and  $\ell_{\text{quad}}$ . The likelihood-ratio statistic  $D = 2(\ell_{\text{quad}} - \ell_{\text{lin}})$  follows, under the null hypothesis that the extra term is unnecessary, a chi-squared distribution with one degree of freedom because the quadratic model introduces exactly one additional parameter.

The  $p$ -value reported in Table 4 is the upper-tail probability  $p = \Pr(\chi_1^2 \geq D)$ .  $p$ -values below 0.05 indicate that the quadratic term yields a statistically significant gain in fit and therefore justifies its inclusion.

We find that for all except for two models (i.e., DeepSeek-R1-Distill-Qwen-1.5B and DeepSeek-R1-Distill-Qwen-7B), the quadratic term for  $\rho$  results in a significantly improved AIC value. Therefore we include the quadratic  $\rho$  term in the GLM specification within the paper.

## G Complete Attribute Ontology

The following section lists the full attribute ontology of all values available for the categories.

**people** Peter, Paul, Mary, John, Mark, Jeff, Craig, Daniel, Anna, Arnoldo, Ali, Benjamin, Joe, Donald, Mitch, Chuck, Jack, Lucas, Jeniffer, Adam, Greg, Allan, David, Ellen, Fred, Hank, Hubert, Ian, Ingrid, Rebecca, Ken, Lewis, Michael, Nathaniel, Oliver, Russ, Steve, Sandy, Ted, Tanya, Veronica, Vincent, Wesley, Brad, Sam, Igor, Sue, Jan, Jeffrey, Jacques, Debby, Olivia, Benedict, Chris, Charles, Harry, Eli, Mahmoud, Chen, William, Linda, Elizabeth, Robert, Jennifer, Emily, Joseph, Thomas, Patricia, Anthony, Jessica, Brian, Lisa, Kevin, Karen, Laura, Eric, Stephanie, Michelle, George, Andrew, Joshua, Amber, Timothy, Victoria, Richard, Cynthia, Brandon, Megan, Matthew, Nancy, Jacqueline, Gary, Dorothy, Edward, Kimberly, Scott, Sara, Justin, Brittany, Ronald, Deborah, Janet, Christopher, Alexander, Samantha, Oscar, Cindy, Frank, Carl, Paula, Irene, Theresa, Dennis, Ralph, Gerald, Martin, Terry, Bryan, Lance, Corey, Casey, Brent, Derek, Travis, Austin, Victor, Jesse, Zachary, Kyle, Aaron, Betty, Connie, Holly, Donna, Gloria, Carla, Isabel, Sylvia, Evelyn, Doris, Arthur, Raymond, Harold, Lawrence, Neil, Brenda, Tracy, Simon, Wendy, Zoe, Ethan, Calvin, Sean, Ruth, Sheila, Miriam, Lorraine, Fay, Sophie

**clothes\_socks** blue, red, yellow, green, purple, pink, orange, black, white, gray

**clothes\_shirt** blue, red, yellow, green, purple, pink, orange, black, white, gray

**clothes\_pant** blue, red, yellow, green, purple, pink, orange, black, white, gray

**clothes\_hat** blue, red, yellow, green, purple, pink, orange, black, white, gray

**clothes\_gloves** blue, red, yellow, green, purple, pink, orange, black, white, gray

**clothes\_underwear** blue, red, yellow, green, purple, pink, orange, black, white, gray

**hair** blue, red, yellow, green, purple, pink, orange, black, white, gray

**recent\_eat** pizza pasta burrito sushi taco burger toast egg banana potatoes

**recent\_listen** rock, pop, country, electronic, folk, jazz, blues, classical, funk, ska, rap, synth, disco, reaggea

**recent\_watch** drama, comedy, thriller, romance, adventure, horror, sci-fi, action, western, fantasy, documentary, mystery, crime, musical

**recent\_read** fiction, mystery, novel, thriller, biography, sci-fi, non-fiction, essay, encyclopedia, dictionary

**location** bathroom livingroom kitchen basement toilet balcony garden pool bedroom store university farm office bank tree museum school airport zoo train bus park butcher library restaurant mall mountain tunnel church river pond harbor taxi gallery bar pizzeria beach gym elevator insurance embassy police hospital festival monument laboratory observatory valley motorway viewpoint synagogue factory castle cave stadium arena cabin plaza amphitheater bridge pier vineyard forest cliff desert creek bay lighthouse orchard resort camp inn motel aquarium bazaar chapel monastery lookout campground retreat dock depot consulate manor theatre cathedral casino lodge mill bakery spa station diner gazebo terrace arcade boardwalk winery hill plateau ridge port oasis market fairground quarry mine grove auditorium cemetery dunes courthouse prison fort granary ranch promenade coliseum field tower pavilion silo bistro labyrinth cafe saloon brewery carnival marina estate safari cottage courtyard waterpark island greenhouse meadow lagoon ford hacienda village marketplace grotto maze golfcourse atrium academy waterfront peninsula cove summit plains

## H Token-length distributions by task length (N) and difficulty (d)

We report token-length distributions per model tokenizer across the full CogniLoad grid in Table 5, Table 6, Table 7, and Table 8. For each model and each (N, d) condition, we show the mean and the 90th percentile (p90) of both the input (prompt) tokens and the output (reasoning) tokens, compactly formatted as Pmean[ $P_{p90}$ ] — Omean[ $O_{p90}$ ]. For example, a cell like P3995[4683] — O14778[25212] indicates that the mean prompt length is  $\approx 3995$  tokens with  $p90 \approx 4683$ , and the mean output length is about  $\approx 14778$  tokens with  $p90 \approx 25212$  for that condition. Presenting both prompt and output side by side makes it possible to separate the load imposed by the puzzle itself from model and tokenizer-specific verbosity in decoding.

Across all models, prompt length grows monotonically with N and increases with d, as expected from the construction of the puzzles. At fixed (N, d), the variation in prompt tokens across tokenizers is small (i.e. typically a few percent) which indicates that models received essentially the same input burden for a given condition. For example, at N = 250 and d = 10 as the highest load condition, prompt means cluster around 16000–17000 tokens, while at d = 1 they are around 3500–4000 with these patterns recurring for every tokenizer. This confirms that differences in performance at fixed (N, d) do not stem from large differences in presented input length.

On the contrary, output lengths vary substantially across models and show heavy-tailed behavior in several cases, especially at larger N. Gemini 2.5 models tend to produce the longest outputs: at N = 250 and moderate d, their output p90 values are frequently in the mid-20000s while prompt p90 values are often around 6500–7000, so totals approach or exceed the 32768-token budget. For instance, at N = 250 and d = 5, gemini-2.5-pro shows approximately P9474[10084] — O23221[24321], and gemini-2.5-flash is in a similar range. These totals explain the higher rates of max-context overflows we observed for Gemini at high N indicating a serving limitation rather than genuine reasoning error. By comparison, o3 and the gpt-5 family are more restrained in their output lengths at the same (N, d): their output p90s are typically around 11000–19000 at N = 250 depending on d, leaving more headroom when paired with prompt p90s near 6500–7000. Mid-tier open models such as DeepSeek-R1-Distill-Llama-70B, Qwen3-32B, QwQ-32B, and EXAONE-Deep-32B generally produce shorter outputs still, for example, Qwen3-32B at N = 250 and d = 7 shows roughly P12419[13055] — O5034[8153], a total far below the context limit. Smaller models often have shorter outputs on average but can occasionally exhibit very long tails. Inspecting their transparent reasoning traces we notice those outliers being consistent with the error taxonomy’s degeneracy categories (e.g., wrong-max-context or ”other”), where models infinitely repeat tokens or drift into infinite reasoning loops rather than concluding. One peculiar case is Gemini-2.5-flash-lite at the cell N=250/d=10 resulting in P16683[17372] — O366[9]. Here this particular model doesn’t even try to reason through the problem but usually just guesses the response with barely any reasoning.

Taken together, these distributions show that prompt length scales predictably with N and d and is closely matched across tokenizers, while output length is where models differ. In our runs, most models and conditions—including

many at  $N = 250$ —remain well below 32768 tokens in total, indicating that CogniLoad puzzles are generally solvable within a 32K context. Overflows are concentrated in specific settings where certain models (notably Gemini 2.5 at high  $N$ ) produce heavy-tailed outputs while smaller models show occasional outliers that, when inspecting the reasoning traces, boil down to infinite reasoning loops and incoherence issues that repeat the same tokens indefinitely. Consequently, for the majority of models and conditions the observed performance trends at long  $N$  reflect reasoning under load rather than system ceilings.

---

**Algorithm 2:** Pseudocode of the CogniLoad scoring pipeline.

---

```
// Prepare data
// Extract windows
last_sentence ← TakeLastSentence(lines[-1]);
poi_lines ← {s ∈ lines : CONTAINS(s, poi)};
poi_last ← LASTOREMPTY(poi_lines);
valid_poi_lines ← {s ∈ poi_lines : CONTAINSANY(s, quals)};
valid_poi_last ← LASTOREMPTY(valid_poi_lines);
// Budget/emptiness guard
if ExceededContext(runtime_meta) ∨ last_sentence = "" ∨ LEN(resp) = 0 then
  ⊥ return wrong_max_context
// Gold matches
c_valid ← CheckCorrectAnswer(gold, valid_poi_last);
c_poi ← CheckCorrectAnswer(gold, poi_last);
c_last ← CheckCorrectAnswer(gold, last_sentence);
// Alternative flags with span rule
alts ← {v ∈ domainValues : v ≠ gold};
a_valid ← AltFlag(valid_poi_last, alts, gold);
a_poi ← AltFlag(poi_last, alts, gold);
a_last ← AltFlag(last_sentence, alts, gold);
// Buckets (first match wins)
if c_valid ∧ ¬a_valid then
  ⊥ return correct_valid
else if c_poi ∧ ¬a_poi then
  ⊥ return correct_poi
else if c_last ∧ ¬a_last then
  ⊥ return correct_last_sentence
else if ¬c_valid ∧ a_valid ∧ valid_poi_last ≠ "" then
  ⊥ return wrong_logic
else if ¬c_poi ∧ a_poi ∧ poi_last ≠ "" then
  ⊥ return wrong_logic_poi
else if ¬c_last ∧ a_last ∧ last_sentence ≠ "" then
  ⊥ return wrong_logic_last_sentence
else
  ⊥ return wrong_other
```

---

---

**Algorithm 3:** Pseudocode of the CogniLoad scoring pipeline utility functions.

---

**Utilities.**

**ExceededContext:** return true if `prompt_tokens + response_tokens + 20 ≥ 32 768`.

**TakeLastSentence( $s$ ):** let  $p = \text{SPLIT}(s, ".")$ . If  $\text{LEN}(p) \geq 2$ , return  $p[-2]$ ; else  $s$ .

**CheckCorrectAnswer( $gold, s$ ):**

- **CheckAnswer( $t, s$ )** is true if any holds:  $\text{STARTSWITH}(s, t)$ ,  $s = t$ , or  $s$  contains one of: "space+t", "[t", ""t", "\*t", "\_t", "{ t", "(t".
- If  $gold = \text{reaggea}$ : return **CheckAnswer**(reaggea)  $\vee$  **CheckAnswer**(reggae).
- If  $sci\text{-}fi$ : return **CheckAnswer**(sci-fi)  $\vee$  **CheckAnswer**(science fiction)  $\vee$  **CheckAnswer**(science-fiction).
- If  $camp$ : **CheckAnswer**(camp)  $\vee$  **CheckAnswer**(campground).
- If  $potatoes$ : **CheckAnswer**(potatoes)  $\vee$  **CheckAnswer**(potato).
- If  $market$ : **CheckAnswer**(market)  $\vee$  **CheckAnswer**(marketplace).
- If  $livingroom$ : **CheckAnswer**(livingroom)  $\vee$  **CheckAnswer**(living room).
- Else: **CheckAnswer**(gold).

**AltFlag( $s, alts, gold$ ):**

1.  $s \leftarrow \text{LOWER}(s)$ ,  $g \leftarrow \text{LOWER}(gold)$ ,  $A \leftarrow \{\text{LOWER}(a) : a \in alts, a \neq g\}$ .
  2.  $\text{alt\_present} \leftarrow \bigvee_{a \in A} \text{CheckCorrectAnswer}(a, s)$ .
  3.  $g\_idx \leftarrow s.\text{RFIND}(g)$ .
  4. **if**  $g\_idx \neq -1$  and  $\text{alt\_present}$ : let  $g\_end = g\_idx + \text{LEN}(g)$ ; set  $\text{spans} = \text{false}$ . For each  $a \in A$ :  
 $a\_idx \leftarrow s.\text{RFIND}(a)$ ; **if**  $a\_idx \neq -1$  and  $a\_idx \leq g\_idx$  and  $a\_idx + \text{LEN}(a) \geq g\_end$ , set  $\text{spans} = \text{true}$ . **If**  $\neg \text{spans}$ , set  $\text{alt\_present} = \text{false}$ .
  5. Return  $\text{alt\_present}$ .
-

| model                         | $p_{LR}$     | $AIC_{\text{linear}}$ | $AIC_{\text{quad}}$ |
|-------------------------------|--------------|-----------------------|---------------------|
| DeepSeek-R1-0528              | <b>0.000</b> | 1032.432              | <b>1019.177</b>     |
| DeepSeek-R1-Distill-Llama-70B | <b>0.000</b> | 13888.760             | <b>13703.165</b>    |
| DeepSeek-R1-Distill-Qwen-1.5B | 0.657        | 11582.864             | 11584.667           |
| DeepSeek-R1-Distill-Qwen-32B  | <b>0.000</b> | 16487.488             | <b>16409.647</b>    |
| DeepSeek-R1-Distill-Qwen-7B   | <b>0.041</b> | 14227.155             | <b>14224.975</b>    |
| EXAONE-Deep-32B               | <b>0.000</b> | 15469.929             | <b>15388.288</b>    |
| Phi-4-mini-reasoning          | <b>0.000</b> | 14462.835             | <b>14438.087</b>    |
| Phi-4-reasoning               | <b>0.000</b> | 13344.906             | <b>13161.306</b>    |
| Phi-4-reasoning-plus          | <b>0.000</b> | 12603.062             | <b>12477.924</b>    |
| QwQ-32B                       | <b>0.000</b> | 16357.613             | <b>16218.181</b>    |
| Qwen3-1.7B                    | <b>0.000</b> | 13700.396             | <b>13684.334</b>    |
| Qwen3-30B-A3B                 | <b>0.000</b> | 15363.614             | <b>15252.219</b>    |
| Qwen3-32B                     | <b>0.000</b> | 14818.588             | <b>14720.097</b>    |
| Qwen3-8B                      | <b>0.000</b> | 15522.392             | <b>15425.101</b>    |
| gemini-2.5-flash              | 0.077        | 807.553               | 806.420             |
| gemini-2.5-flash-lite         | <b>0.000</b> | 1574.306              | <b>1555.886</b>     |
| gemini-2.5-pro                | 0.201        | 642.222               | 642.583             |
| gpt-5-2025-08-07              | <b>0.001</b> | 484.186               | <b>474.503</b>      |
| gpt-5-mini-2025-08-07         | <b>0.000</b> | 1044.689              | <b>1023.604</b>     |
| gpt-5-nano-2025-08-07         | <b>0.000</b> | 1520.921              | <b>1500.138</b>     |
| o3-2025-04-16                 | 0.121        | 692.757               | 692.356             |
| o4-mini-2025-04-16            | <b>0.000</b> | 1002.927              | <b>970.994</b>      |

Table 4: Model comparison: linear vs. quadratic fit. A bold number indicates a significant improvement of  $AIC_{\text{quad}}$  over  $AIC_{\text{linear}}$  with  $p < 0.05$ .

| Model                         | d                       |                        |                          |                           |                           | 10                        |
|-------------------------------|-------------------------|------------------------|--------------------------|---------------------------|---------------------------|---------------------------|
|                               | 1                       | 3                      | 5                        | 7                         | 10                        |                           |
| DeepSeek-R1-0528              | P400[424]—O4135[6756]   | P626[690]—O4697[5531]  | P924[1008]—O6194[4777]   | P1218[1358]—O6901[8474]   | P1218[1358]—O6901[8474]   | P1728[1958]—O8225[9710]   |
| DeepSeek-R1-Distill-Llama-70B | P358[404]—O1686[2739]   | P616[683]—O2361[3245]  | P904[996]—O2456[3364]    | P1209[1348]—O2829[3972]   | P1209[1348]—O2829[3972]   | P1681[1924]—O2473[4067]   |
| DeepSeek-R1-Distill-Qwen-1.5B | P369[415]—O2372[119748] | P627[694]—O2261[64932] | P915[1007]—O20799[61653] | P1220[1359]—O17447[37955] | P1220[1359]—O17447[37955] | P1692[1935]—O17871[36281] |
| DeepSeek-R1-Distill-Qwen-32B  | P369[415]—O2447[3914]   | P627[694]—O289[4668]   | P915[1007]—O2686[3569]   | P1220[1359]—O2776[3908]   | P1220[1359]—O2776[3908]   | P1692[1935]—O2941[4668]   |
| DeepSeek-R1-Distill-Qwen-7B   | P393[438]—O3492[5413]   | P627[694]—O4771[6554]  | P915[1007]—O5635[7088]   | P1220[1359]—O5842[8063]   | P1220[1359]—O5842[8063]   | P1692[1935]—O4979[6996]   |
| EXAONE-Deep-32B               | P369[416]—O7086[11418]  | P625[690]—O8012[10967] | P913[1003]—O9423[12726]  | P1251[1393]—O11174[14357] | P1251[1393]—O11174[14357] | P1730[1979]—O10971[15880] |
| Phi-4-mini-reasoning          | P579[625]—O3663[5530]   | P837[904]—O5182[6575]  | P1125[1217]—O6682[8409]  | P1430[1569]—O7971[10066]  | P1430[1569]—O7971[10066]  | P1687[1929]—O9417[12983]  |
| Phi-4-reasoning-plus          | P556[625]—O5342[8017]   | P823[896]—O6319[8146]  | P1124[1218]—O8266[10849] | P1442[1597]—O10442[13677] | P1442[1597]—O10442[13677] | P1902[2145]—O9835[12502]  |
| QwQ-32B                       | P374[420]—O4194[7729]   | P632[699]—O4699[6743]  | P920[1012]—O5032[6622]   | P1225[1364]—O5239[7108]   | P1225[1364]—O5239[7108]   | P1697[1940]—O5399[7909]   |
| Qwen3-1.7B                    | P372[418]—O4774[7658]   | P630[697]—O6857[7752]  | P918[1010]—O4129[6464]   | P1223[1362]—O3030[5337]   | P1223[1362]—O3030[5337]   | P1695[1938]—O2067[4015]   |
| Qwen3-30B-A3B                 | P372[418]—O3030[5608]   | P630[697]—O4673[6464]  | P918[1010]—O4107[5337]   | P1223[1362]—O3546[4907]   | P1223[1362]—O3546[4907]   | P1695[1938]—O3141[5082]   |
| Qwen3-32B                     | P372[418]—O2307[4211]   | P630[697]—O2935[4758]  | P918[1010]—O3054[4355]   | P1223[1362]—O2902[4322]   | P1223[1362]—O2902[4322]   | P1695[1938]—O2928[4502]   |
| Qwen3-8B                      | P372[418]—O4262[6898]   | P630[697]—O5222[6698]  | P918[1010]—O5048[6469]   | P1223[1362]—O4789[6324]   | P1223[1362]—O4789[6324]   | P1695[1938]—O2967[5742]   |
| gemini-2.5-flash              | P364[411]—O2130[2924]   | P625[696]—O3947[5396]  | P900[997]—O6015[8151]    | P1217[1345]—O6926[8780]   | P1217[1345]—O6926[8780]   | P1699[1935]—O7769[10955]  |
| gemini-2.5-flash-lite         | P364[411]—O1073[1246]   | P625[696]—O1700[2510]  | P900[997]—O1897[2850]    | P1217[1345]—O2002[3016]   | P1217[1345]—O2002[3016]   | P1699[1935]—O1851[3585]   |
| gemini-2.5-pro                | P364[411]—O2784[3842]   | P625[696]—O4398[6015]  | P900[997]—O5895[7953]    | P1217[1345]—O7360[9669]   | P1217[1345]—O7360[9669]   | P1699[1935]—O8311[11803]  |
| gpt-5-2025-08-07              | P357[404]—O1228[1750]   | P615[685]—O2768[3534]  | P889[984]—O3449[4250]    | P1207[1334]—O3682[4627]   | P1207[1334]—O3682[4627]   | P1686[1914]—O4256[5212]   |
| gpt-5-mini-2025-08-07         | P357[404]—O1670[2313]   | P615[685]—O3066[3555]  | P889[984]—O4256[5302]    | P1215[1351]—O5182[6320]   | P1215[1351]—O5182[6320]   | P1686[1914]—O6277[7873]   |
| gpt-5-nano-2025-08-07         | P357[404]—O2633[5018]   | P615[685]—O4444[6470]  | P889[984]—O5917[9075]    | P1207[1334]—O6704[9436]   | P1207[1334]—O6704[9436]   | P1686[1914]—O8127[12956]  |
| o3-2025-04-16                 | P357[404]—O933[1359]    | P615[685]—O2126[2580]  | P889[984]—O2685[3213]    | P1207[1334]—O2933[3866]   | P1207[1334]—O2933[3866]   | P1686[1914]—O3571[4685]   |
| o4-mini-2025-04-16            | P357[404]—O1682[2462]   | P615[685]—O2743[3545]  | P889[984]—O3352[4253]    | P1207[1334]—O3686[4569]   | P1207[1334]—O3686[4569]   | P1686[1914]—O4503[5861]   |

Table 5: Prompt and output tokens by model at N=20. Cells show Pmean[Op]—Omean[Op], Pp=Op=p90.

| Model                         | d                       |                           |                            |                           |                           | 10                        |
|-------------------------------|-------------------------|---------------------------|----------------------------|---------------------------|---------------------------|---------------------------|
|                               | 1                       | 3                         | 5                          | 7                         | 10                        |                           |
| DeepSeek-R1-0528              | P779[908]—O6060[8073]   | P1372[1537]—O7714[9286]   | P2021[2195]—O10932[13181]  | P2682[2900]—O12144[15058] | P2682[2900]—O12144[15058] | P3658[3946]—O12701[15868] |
| DeepSeek-R1-Distill-Llama-70B | P774[884]—O2503[3688]   | P1362[1500]—O4136[5655]   | P1987[2143]—O4427[6201]    | P2652[2851]—O4129[6600]   | P2652[2851]—O4129[6600]   | P3669[3933]—O3245[5604]   |
| DeepSeek-R1-Distill-Qwen-1.5B | P815[925]—O1722[3643]   | P1403[1541]—O14514[33405] | P2028[2184]—O13125[32676]  | P2693[2892]—O12702[32454] | P2693[2892]—O12702[32454] | P3710[3974]—O14078[32989] |
| DeepSeek-R1-Distill-Qwen-32B  | P815[925]—O3305[5198]   | P1403[1541]—O4753[6624]   | P2028[2184]—O4671[6376]    | P2693[2892]—O4820[7171]   | P2693[2892]—O4820[7171]   | P3710[3974]—O4162[7217]   |
| DeepSeek-R1-Distill-Qwen-7B   | P842[950]—O4721[7396]   | P1403[1541]—O6534[9242]   | P2028[2184]—O7725[11797]   | P2693[2892]—O8318[29548]  | P2693[2892]—O8318[29548]  | P3710[3974]—O5995[26866]  |
| EXAONE-Deep-32B               | P784[896]—O7723[10840]  | P1369[1497]—O9218[12190]  | P1992[2145]—O9301[13126]   | P2654[2848]—O8619[12060]  | P2654[2848]—O8619[12060]  | P3710[3974]—O9117[13680]  |
| Phi-4-mini-reasoning          | P995[1105]—O5733[8056]  | P1583[1721]—O8164[10198]  | P2208[2364]—O11462[14776]  | P2874[3073]—O13659[19401] | P2874[3073]—O13659[19401] | P3890[4154]—O15917[28612] |
| Phi-4-reasoning-plus          | P983[1105]—O7885[11340] | P1596[1745]—O10537[13481] | P2240[2419]—O114875[19947] | P2931[3218]—O19655[29629] | P2931[3218]—O19655[29629] | P4006[4619]—O21226[28904] |
| QwQ-32B                       | P820[930]—O5988[9091]   | P1408[1546]—O6617[8934]   | P2033[2189]—O7580[10243]   | P2698[2897]—O7937[11646]  | P2698[2897]—O7937[11646]  | P3715[3979]—O6928[11473]  |
| Qwen3-1.7B                    | P818[928]—O4180[7015]   | P1406[1544]—O5482[7856]   | P2031[2187]—O3682[6167]    | P2696[2895]—O2492[4879]   | P2696[2895]—O2492[4879]   | P3713[3977]—O1867[4431]   |
| Qwen3-30B-A3B                 | P818[928]—O3847[5532]   | P1406[1544]—O5600[7227]   | P2031[2187]—O5240[6894]    | P2696[2895]—O5077[7280]   | P2696[2895]—O5077[7280]   | P3713[3977]—O4451[7365]   |
| Qwen3-32B                     | P818[928]—O3547[5774]   | P1406[1544]—O4416[6680]   | P2031[2187]—O4189[6276]    | P2696[2895]—O4045[6100]   | P2696[2895]—O4045[6100]   | P3713[3977]—O3730[6143]   |
| Qwen3-8B                      | P818[928]—O5183[7561]   | P1406[1544]—O6971[8185]   | P2031[2187]—O6023[8164]    | P2696[2895]—O5784[7660]   | P2696[2895]—O5784[7660]   | P3713[3977]—O4879[7485]   |
| gemini-2.5-flash              | P810[922]—O4343[6115]   | P1373[1501]—O7708[10836]  | P2030[2208]—O12945[17344]  | P2688[2883]—O16780[22526] | P2688[2883]—O16780[22526] | P3691[3957]—O18449[28927] |
| gemini-2.5-flash-lite         | P810[922]—O1840[2739]   | P1373[1501]—O2971[5314]   | P2030[2208]—O3570[5976]    | P2688[2883]—O2867[5504]   | P2688[2883]—O2867[5504]   | P3691[3957]—O1510[5970]   |
| gemini-2.5-pro                | P810[922]—O5958[8294]   | P1373[1501]—O9435[13393]  | P2030[2208]—O15287[17418]  | P2688[2883]—O14723[20703] | P2688[2883]—O14723[20703] | P3691[3957]—O16236[21429] |
| gpt-5-2025-08-07              | P770[884]—O2112[2900]   | P1335[1463]—O5251[6805]   | P1992[2169]—O5976[7904]    | P2644[2830]—O6239[8467]   | P2644[2830]—O6239[8467]   | P3646[3914]—O6534[8732]   |
| gpt-5-mini-2025-08-07         | P770[884]—O2670[3788]   | P1335[1463]—O5794[6779]   | P1992[2169]—O8959[11716]   | P2644[2830]—O10562[14197] | P2644[2830]—O10562[14197] | P3646[3914]—O9879[15575]  |
| gpt-5-nano-2025-08-07         | P770[884]—O4146[6810]   | P1335[1463]—O7488[11220]  | P1992[2169]—O10491[15707]  | P2644[2830]—O10557[16212] | P2644[2830]—O10557[16212] | P3646[3914]—O9268[16136]  |
| o3-2025-04-16                 | P770[884]—O1704[2388]   | P1335[1463]—O4123[5006]   | P1992[2169]—O5237[7181]    | P2644[2830]—O3571[8103]   | P2644[2830]—O3571[8103]   | P3646[3914]—O5411[7861]   |
| o4-mini-2025-04-16            | P770[884]—O2692[4426]   | P1335[1463]—O4439[5671]   | P1992[2169]—O6120[9511]    | P2644[2830]—O5831[9118]   | P2644[2830]—O5831[9118]   | P3646[3914]—O6446[9573]   |

Table 6: Prompt and output tokens by model at N=50. Cells show Pmean[Op]—Omean[Op], Pp=Op=p90.

| Model                         | d           |               |             |             |               | 10          |               |             |               |
|-------------------------------|-------------|---------------|-------------|-------------|---------------|-------------|---------------|-------------|---------------|
|                               | 1           | 3             | 5           | 7           | 10            |             |               |             |               |
| DeepSeek-R1-0528              | P1457[1684] | O8142[11134]  | P2627[2930] | P3873[4119] | O14319[18636] | P5035[5376] | O11861[17026] | P6860[7253] | O10608[13931] |
| DeepSeek-R1-Distill-Llama-70B | P1468[1684] | O3628[5573]   | P2630[2904] | P3793[4071] | O6587[10134]  | P5009[5308] | O3706[10984]  | P6878[7239] | O4133[8443]   |
| DeepSeek-R1-Distill-Qwen-1.5B | P1560[1776] | O16989[34188] | P2722[2996] | P3885[4163] | O10608[31366] | P5101[5400] | O10769[29845] | P6970[7331] | O9680[28165]  |
| DeepSeek-R1-Distill-Qwen-32B  | P1560[1776] | O4480[7023]   | P2722[2996] | P3885[4163] | O7847[11083]  | P5101[5400] | O7047[11282]  | P6970[7331] | O5578[10228]  |
| DeepSeek-R1-Distill-Qwen-7B   | P1560[1776] | O5504[9157]   | P2722[2996] | P3885[4163] | O10153[32087] | P5101[5400] | O8469[31107]  | P6970[7331] | O8149[30381]  |
| EXAONE-Deep-32B               | P1588[1859] | O13168[17829] | P2758[3051] | P3931[4219] | O13399[18030] | P5160[5470] | O10195[14815] | P7034[7399] | O7605[11342]  |
| Phi-4-mini-reasoning          | P1475[1695] | O8778[12190]  | P2633[2908] | P3792[4060] | O8457[12413]  | P5003[5302] | O7324[10152]  | P6864[7220] | O6699[9230]   |
| Phi-4-reasoning               | P1689[1905] | O8360[11469]  | P2851[3125] | P4015[4295] | O15167[22715] | P5230[5529] | O16521[27514] | P7103[7462] | O16996[25674] |
| Phi-4-reasoning-plus          | P1694[1968] | O12270[16909] | P2910[3238] | P4123[4586] | O20288[28560] | P5309[5620] | O19976[27662] | P7309[8426] | O19392[25782] |
| QwQ-32B                       | P1565[1781] | O7625[10956]  | P2727[3001] | P3890[4168] | O9089[13166]  | P5106[5405] | O9096[13950]  | P6975[7336] | O8298[12846]  |
| Qwen3-1.7B                    | P1563[1779] | O4079[7309]   | P2725[2999] | P3888[4166] | O4191[7665]   | P5104[5403] | O2933[6423]   | P6973[7334] | O2144[7498]   |
| Qwen3-30B-A3B                 | P1563[1779] | O4949[7052]   | P2725[2999] | P3888[4166] | O6443[9249]   | P5104[5403] | O5233[8618]   | P6973[7334] | O4263[8469]   |
| Qwen3-32B                     | P1563[1779] | O5141[7983]   | P2725[2999] | P3888[4166] | O5157[7311]   | P5104[5403] | O4638[7052]   | P6973[7334] | O3961[6269]   |
| Qwen3-8B                      | P1563[1779] | O6076[8098]   | P2725[2999] | P3888[4166] | O7797[10327]  | P5104[5403] | O7076[10829]  | P6973[7334] | O5596[10241]  |
| gemini-2.5-flash              | P1536[1771] | O8290[13046]  | P2699[2990] | P3910[4123] | O25507[29050] | P5087[5439] | O25224[28010] | P6909[7279] | O23637[26097] |
| gemini-2.5-flash-lite         | P1536[1771] | O2526[3917]   | P2699[2990] | P3910[4123] | O5391[10345]  | P5087[5439] | O2846[8615]   | P6909[7279] | O1612[7689]   |
| gemini-2.5-pro                | P1536[1771] | O10927[15454] | P2699[2990] | P3910[4123] | O21258[28842] | P5087[5439] | O21546[27761] | P6909[7279] | O22577[26042] |
| gpt-5-2025-08-07              | P1446[1683] | O3294[4693]   | P2606[2884] | P3814[4016] | O8165[11989]  | P4992[5333] | O8733[13057]  | P6808[7173] | O9283[12365]  |
| gpt-5-mini-2025-08-07         | P1446[1683] | O3808[5621]   | P2606[2884] | P3814[4016] | O13104[18082] | P5037[5337] | O12790[21517] | P6808[7173] | O12440[17742] |
| gpt-5-nano-2025-08-07         | P1607[1683] | O5999[9006]   | P2627[2905] | P3814[4016] | O13450[19789] | P4992[5333] | O9336[17104]  | P6808[7173] | O8322[15122]  |
| o3-2025-04-16                 | P1446[1683] | O2717[4066]   | P2606[2884] | P3814[4016] | O6959[10925]  | P4992[5333] | O6897[10914]  | P6808[7173] | O8748[14425]  |
| o4-mini-2025-04-16            | P1446[1683] | O4153[6167]   | P2606[2884] | P3814[4016] | O7910[13477]  | P4992[5333] | O7269[12320]  | P6808[7173] | O8365[16052]  |

Table 7: Prompt and output tokens by model at N=100. Cells show Pmean[Op], Pp=Op=p90.

| Model                         | d           |               |             |              |               | 10            |               |               |               |
|-------------------------------|-------------|---------------|-------------|--------------|---------------|---------------|---------------|---------------|---------------|
|                               | 1           | 3             | 5           | 7            | 10            |               |               |               |               |
| DeepSeek-R1-0528              | P3639[4255] | O11660[15547] | P6442[6992] | P9132[9696]  | O10608[13547] | P12014[12793] | O10417[13038] | P16345[17021] | O9524[11707]  |
| DeepSeek-R1-Distill-Llama-70B | P3547[4084] | O4738[7376]   | P6355[6974] | P9173[9789]  | O8206[16317]  | P12024[12660] | O6814[15722]  | P16395[16998] | O4547[11339]  |
| DeepSeek-R1-Distill-Qwen-1.5B | P3939[4476] | O16892[32864] | P6747[7366] | P9565[10181] | O11895[28483] | P12416[13052] | O11754[28378] | P16787[17390] | O8652[19503]  |
| DeepSeek-R1-Distill-Qwen-32B  | P3939[4476] | O5778[10068]  | P6747[7366] | P9565[10181] | O15297[23500] | P12416[13052] | O12679[22803] | P16787[17390] | O9262[21900]  |
| DeepSeek-R1-Distill-Qwen-7B   | P3939[4476] | O5362[10426]  | P6747[7366] | P9565[10181] | O8579[26492]  | P12416[13052] | O8531[25679]  | P16787[17390] | O7354[23761]  |
| EXAONE-Deep-32B               | P3977[4500] | O12691[16997] | P6801[7452] | P9641[10282] | O11156[15514] | P12513[13177] | O8395[12329]  | P16933[17577] | O5523[9281]   |
| Phi-4-mini-reasoning          | P3550[4096] | O8854[12622]  | P6345[6934] | P9153[9758]  | O7091[10159]  | P11993[12610] | O6053[8649]   | P16345[16948] | O5462[7771]   |
| Phi-4-reasoning               | P3768[4305] | O14056[19926] | P6576[7195] | P9394[10010] | O18249[23605] | P12245[12881] | O18222[20994] | P16616[17219] | O14578[16740] |
| Phi-4-reasoning-plus          | P3830[4315] | O20039[28464] | P6796[7802] | P9739[11372] | O20595[23689] | P12670[14810] | O19383[21013] | P17347[20890] | O15076[16718] |
| QwQ-32B                       | P3944[4481] | O9353[13906]  | P6752[7371] | P9570[10186] | O13878[21556] | P12421[13057] | O12844[20036] | P16792[17395] | O10085[16212] |
| Qwen3-1.7B                    | P3942[4479] | O3919[7534]   | P6750[7369] | P9568[10184] | O5147[12851]  | P12419[13055] | O4673[10236]  | P16792[17394] | O2718[13976]  |
| Qwen3-30B-A3B                 | P3942[4479] | O7036[10502]  | P6750[7369] | P9568[10184] | O7500[14503]  | P12419[13055] | O5664[13342]  | P16790[17393] | O3418[8000]   |
| Qwen3-32B                     | P3942[4479] | O6840[9827]   | P6750[7369] | P9568[10184] | O6474[9809]   | P12419[13055] | O5034[8153]   | P16790[17393] | O3654[6255]   |
| Qwen3-8B                      | P3942[4479] | O8146[12378]  | P6750[7369] | P9568[10184] | O9710[18564]  | P12419[13055] | O8019[17663]  | P16790[17393] | O5349[13378]  |
| gemini-2.5-flash              | P3995[4683] | O5843[10440]  | P6768[7256] | P9474[10084] | O23629[24363] | P12351[13131] | O20829[21494] | P16683[17372] | O16508[17088] |
| gemini-2.5-flash-lite         | P3995[4683] | O21432[28925] | P6768[7256] | P9474[10084] | O6728[21344]  | P12351[13131] | O3665[19711]  | P16683[17372] | O3666[9]      |
| gemini-2.5-pro                | P3596[4232] | O5910[7532]   | P6376[6874] | P9076[9672]  | O13513[17813] | P11944[12654] | O20327[21494] | P16265[16934] | O13799[16902] |
| gpt-5-2025-08-07              | P3596[4232] | O6472[8818]   | P6376[6874] | P9076[9672]  | O15604[20850] | P11944[12654] | O15981[20713] | P16274[16934] | O13598[16832] |
| gpt-5-mini-2025-08-07         | P3762[4246] | O10611[16059] | P6376[6874] | P9076[9672]  | O8661[17818]  | P11944[12654] | O6539[16148]  | P16267[16934] | O4498[11784]  |
| gpt-5-nano-2025-08-07         | P3589[4232] | O4971[7131]   | P6376[6874] | P9076[9672]  | O10748[16757] | P11944[12654] | O12022[19860] | P16265[16934] | O11833[16704] |
| o3-2025-04-16                 | P3604[4232] | O6679[9945]   | P6376[6874] | P9076[9672]  | O11155[19673] | P11948[12662] | O10845[19674] | P16265[16934] | O10263[16382] |

Table 8: Prompt and output tokens by model at N=250. Cells show Pmean[Op], Pp=Op=p90.
